# Supplementary material for: Evidencing Impact of Large-scale Health System Transformation: Introducing the ‘shift’ Framework
Source: Research Square preprint supplement (doi:10.21203/rs.3.rs-7715080/v1), 2025-11-26
Supplement: Supplementary file 1 [file 6e733822adfbc6784f980b26.docx]

**Supplementary Data File 2:**

**Increasing spheres of influence & interest across impact pathway in combination with spirals of monitoring, evaluating and learning with stakeholders**

**PRELIMINARY IMPACT FRAMEWORK FOR SYSTEM &**

**WORKFORCE TRANSFORMATION**

| **OUTCOMES** | **Changes in:**   - **knowledge, skills and /or** - **relationships/partnerships** - **leading to actions/changes of behaviour**   We have located these changes at either the micro, meso or macro level most relevant or identified them as impacts that apply to all system levels, referring to them as the ‘building blocks’/enablers for more sustainable change | | | **Changes in policy and practice at individual or organisational level** | **System changes associated with sustainability and achievement of longer-term outcomes** | **Changes in social, economic and environmental conditions (including green issues)**  **REALISED**  **BENEFITS** |
| --- | --- | --- | --- | --- | --- | --- |
| **MACRO**  **SYSTEM LEVEL** | **MESO (Organisation)**  **SYSTEM LEVEL** | **MICRO**  **SYSTEM LEVEL** |
| **STRATEGIC ALIGNMENT**  **ACROSS THE**  **SYSTEM** | SA1.Strategic alignment known to all1,8, 16, 17, 18, 19, 20,30, 32,33, 38, 41, 42,43,52,56,57,58,61,63,64,66  SA2.Shared values and purposes including being person centred, safe and effective 1,2,3,5,6,8,10,13, 15, 16, 17, 18, 19, 20 22 25,26,28 29, 30, 32,33,36,37, 38, 41, 42,43,49, 50,52,57,58,61,62,64,66 | | | P1. System-wide learning and working10,13, 14, 15, 16, 17, 18, 19,20,22 30, 32,33,36,37, 38, 41, 42,43,56,57,58,61,62,64  P2. System-wide guideline implementation and communication for safety10, 16, 17, 18, 20,26,28, 30, 32,36, 38, 41, 42,43,56,57,58,61,62,64 | S1. Primary healthcare renewal for improvement and innovation based on co design and person-centred values (includes e.g. single point of access, person receives care in own community, clear referral mechanisms, community hubs) 1, 11, 15, 16, 18,29, 32,33,50,61,66 | L1. Improved population health and wellbeing15,19, 27, 30, 32,38, 41, 42, 43,56,57,61,64,66 through indicators such as:   - reduced loneliness & isolation 24, 40, 45, 46 - Reduced morbidity2,32,43 - Improved mortality rates2**,** 18, 20, 32, 43 - Greater responsibility for own health & wellbeing 64   L4. Increased numbers of people remaining in their own homes 15, 24, 30, 32,40, 43,  L5. Improved determinants of health and social care inequality through Public Health data2,20,61,64,66  L6. Cost savings/ cost effective improvements in services 16, 17, 19,20, 23, 30, 32,38, 40, 42.43,47,56,57,64, 67 |
|  | SA3.Organisational readiness to learn and change 1,3,16,17,18,19,20,  28, 29, 30,31, 32, 38, 39, 41, 42,43,44,50,52,56,57,58,61,62,63,64, 67  SA4. Senior organisation teams develop a shared understanding of the leadership approaches required to support and enable frontline teams provide quality, safe and effective care through cultures of effectiveness that are also good places to work (includes reducing staff fatigue through mediating the pressure of multiple projects) 5,8, 9, 11,14, 17,19,20, 25,28, 29, 30, 31, 32,36,38,41,42,43,48,50,52,56,57, 58,61,62,63,64, 67 |  |
| **DEGREE OF INTEGRATION** | Di1. Evidence of integration across the system involving all stakeholders1, 16, 18,19,20, 26, 30, 32,38, 41,42,43, 47,50,56,57,58,64,65 | Di2.Interdependent partners working together across primary, secondary & tertiary care2, 15 16,19, 24, 29, 30, 32,33,36, 38, 41, 42, 43,47,50,56,58,64, | Di3. Teams working across boundaries10, 11, 15, 16, 17, 18,19,20, 22, 29, 30, 32,33,36, 37 38, 39, 41, 42, 43,44,46, 47, 48, 49, 52,56,57,58,61,62,64,66 | P3. Better partnerships/relationships with services and agencies across health and care system3, 9, 15, 16, 19,20, 23,29, 30, 32,33, 38, 41,42,43, 46, 47, 50,56,57,58,61,64,66, 67  P4. Improved integration of services 3, 16, 18, 19, 20, 24, 29, 30, 32,33, 38, 42,43, 47,56,57,58,64 | S2. Significant improvement in person centred, safe and effective services across the system.2, 4, 7, 14, 15 16, 18, 19, 20, 30, 32,38, 41,42,43, 47,49, 56,57,58,62,64, 67  S3. Reduced variation in care pathways delivery across regions, communities and populations2, 14, 16 18, 29, 32,33, 42,43, 47,56,58,61,64 |
| **WHOLE PATHWAY COMMISSSIONNING** | WPC1. Whole pathway commissioning- integrated information & funding systems and resources including IT 2, 16, 18, 27,28, 30, 32,33,36, 43,56,58,61,62,64  WPC2.System wide leaders with skills of embedded researcher to evaluate effectiveness of care9, 16, 18,20,27,28, 30, 32,33,36, 38, 41, 42, 43, 47,49, 50,52,56,57,58,61,62,64 |  |  |  | S4. Shorter Surgical/treatment, waiting times1,2,6,33, 47 ,58  S5. Reduced need for urgent and emergency care referral and improvements in loss of life 2, 18, 32,33, 47,58  S6. Improved symptom control of health/illness need 7, 16, ,24, 32,33, 38, 43, 45, |
| **CO-PRODUCTION WITH PEOPLE & COMMUNITIES** | CP1. Co-production of services with people and communites1, 4, 14, 15,16,19,20,.26,29,30,33,  36,38,40,43,47,50,52,56,57,64,65  CP2.Active involvement of patients and families and sustained engagement1, 14, 15, 16, 18,19,20, 29, 30,33, 38, 40,43,49,50,52,56,58,61,64  CP3. Evaluation and monitoring of population health and social care needs2, 11, 15, 16, 18, 27, 30,33, 43, 47,58,61,64,65 | CP5.Patient and family voices, invited, heard and acted on1, 14, 15, 16,19,20,29, 32,33, 38, 40, 43, 45,50,56,61,64  CP6.Active participation and engagement of physicians1, 15, 30, 32,38, 43,52  CP7.Staff positive engagement with change 1, 3, 16,17,19,20,22, 28, 29, 30, 32,37, 38, 39, 41,42, 43,44, 46, 47,48,50,52,57,61,62,63,64,65,66, 67 | CP8. Team members working with service users, staff and students to identify and act on what matters to them (e.g. quality and safety champions) 4,13,14, 15,16,17,19,22,23,28,30,33,  36,38,39,41,42,43,44,46,47,48,49,50,52,57,61,62,64,65,  66, 67 | P5. Improved pathway outcomes closer to home7, 15, 16, 19,20,23,29, 30, 32,33, 38, 40, 43,56,58,64  P6. Public information for navigating the system2, 16, 29, 30, 32,40, 43,58  P7. Formal Learning networks and communities of practice available for service users and providers 8, 9, 10, 13, 15,19,20 23, 29, 30,33,36, 38, 41, 43,56,57,58,61,62,64,65,67  P8. Public/citizen consultation on CPD priorities14, 15, 40, 43 | S7. Significant involvement of public, service users, carers and families have been involved in joint activities to improve and evaluate services7, 14, 15, 16,19,20, 27, 29, 30,38, 42, 43, 47,61,64,65,66  S8. Patient and family centred’ care’1,15, 16,17,19,20,27, 29, 30, 32,38, 40, 41, 43,61,64  S9. Sustainable citizen engagement19,26, 30, 32,40, 43, 45,61,64,65,66  S10. Increasing number and diversity of experts by experience 14, 15, 43,64  S11.Number of community champions and ambassadors 23, 40, 43  S12.Timely care in the right place2, 16, 17,18,19,29, 30, 32,38, 43, 47,49,58,64,  S13. CPD investment contributes to person centered, safe and effective care and system transformation and enable commissioners and education providers to optimize CPD’s full potential within the scope of professional roles and responsibilities14, 15, 16, 17, 30,38,41,42,47,48,49,50,52,56,57,61,62,64,66, 67 |
| **MEASURING**  **WHAT MATTERS TO PEOPLE, & COMMUNITIES** | MWM1. Active participation of all relevant stakeholders in determining what is measured (pts and clinicians) informed by shared meaning, consistency across the system and constant review of feedback and relevance of measures 1, 15, 16, 17, 18,19, 26, 29, 30, 32,38, 43, 45, 47, 48,50,52,56,57,58,61,62,64,65 |  | MWM2.Engaging with different types of knowledge (e.g. through using different tools/approaches) for inquiry, evaluation and equity. 1, 3, 14, 15, 16, 17,19, 20, 22,27, 29, 30, 32,38, 39, 41,42,43,44, 47,50,52,57,61,62,64,65,66  MWM3.Updating, developing, and making use of knowledge in the workplace. 3,11, 14, 15, 16 17,18, 19, 20, 22, 29, 30, 32,37, 38, 39, 41,42,43,44, 47, 49, 50,52,56,57,61,62,64,65,66, 67 | P9. Knowledge-rich cultures3, 16, 17, 20,29, 30, 32,37, 38, 39, 40, 41, 42, 43, 44,52,57,61,64,65  P10.Involvement in research and evaluation4, 16, 17, 19, 20,29, 30, 32,38, 39, 41, 42, 43, 44, 47,50,52,57,61,62,63,65, 67  P11.Agreement about the measures that matter to people and communities. 1, 4, 16, 17, 18, 19, 30,33, 38, 40, 42,43,50,57,61,62,64,65,66 | S14. Improved service user and provider experiences against agreed outcomes3, 14, 16, 17, 18, 19, 20,27, 29, 30, 32,33, 38, 39, 40, 42,43,52,56,57,61,62,63,64,66  S15. Reduced Incidents and safety indicators3,4,5, 14, 16, 17,18,19, 20, 30, 32,38, 39, 41, 42, 43,56,57,58,61,62  S16.Service/practice awards for innovation and quality3, 16, 17, 19,30,38, 39, 41, 42, 43, 47,50,58,62 |
| MWM4.Measure what matters constantly reviewed1,4, 17, 19,30,38, 40, 43, 47,50,61,64,65  MWM5. Change for good and focus on what matters1,6, 13, 15, 16, 17,19, 20, 21,22, 23 30,36, 37, 38, 39, 40, 41,42, 43, 44, 45, 46, 47,50,56,57,61,62,64,65 | | |
| **SYSTEMS LEADERSHIP &**  **LEADERSHIP AT EVERY LEVEL OF SYSTEM** | SL1.Distributive/Collective, compassionate and designated leadership across professions, organisations and teams1,6,8,10,11, 16, 17,18,19, 20, 22, 23, 26,29, 30, 31, 32,34,36, 38 39, 41, 42, 43, 44, 47, 48, 49, 50,52,56,57,58, 61, 62,64  SL2.Clinical systems Leaders with integrated capabilities for system and workforce transformation, evaluation and implementation 2,4,7,10,11, 14, 16, 17,18,20, 21,22, 28, 30,31, 32,33,36,38,39,41,42,43,  44,47,48,56,57,58,61,62,  64,65, 67  SL3.System Culture is person centred and effective and embraces psychological safety at every level 1, 6,10, 13,14, 16, 17,19, 20, 26, 30, 32,36,37 38, 41, 42, 43, 48,50,56,57,58,61,62,64  SL4.Multi professional leadership programmes across system which focus on transformational change starting with self.1,11, 14, 16, 17,19,20, 25, 29, 30, 32,36, 37, 38,39,41,42,44,48,52,57,61,62,66 | SL5.Leadership, professional expertise and collaborative ways of working2,6,8, 10,11, 16, 17,19,20, 22, 26, 28, 29, 30, 31, 32,33,34, 37, 38, 39, 40, 41,42,43,44, 45, 46, 47, 48,50,52,56,58,61,62,63,64,66  SL6.Shared governance integrating learning, quality, safety, knowledge translation, learning transfer and inquiry and innovation4, 9, 14, 15, 16, 17, 29, 30, 31, 32,37, 38, 41, 42, 43,44, 47,52,56,57,58,61,62,64,65 | SL7.Team leadership development 3,4,5,11, 16, 17,19, 20, 22, 25,26,28, 29, 30, 31, 32,34, 37, 38, 39, 41, 42, 43,44, 46, 47,48,50,52,57,61,62,63,64,66  SL8.Collective leadership opportunities4,6,11, 14, 16, 17,19, 20, 23,25,26,28, 29, 30, 31, 32,33,34, 37, 38, 38, 39, 41, 42, 43,44, 47, 48,50,52,56,57,61,62,63,64,66  SL9.Positive workplace culture that enables person centred, safe and effective care where staff flourish1,2,3,5,6,10,11, 13, 14, 16, 17,19, 20,21, 22,23, 25,26, 29,30, 31, 32,33,34,37, 38, 39, 41, 42, 43,44, 45, 46, 47, 48,49,50,52,56,57,58,61,62,64,  65,66,67  SL10.Increased creativity and innovation for solutions and improvements in health and social care (including telemedicine) practice. 6,8, 15, 16, 17,19,20, 22, 23, 27, 29, 30, 32,33, 37, 38, 39, 41, 42, 43,44, 45,46,47,48,49,50,52,57,58,61,  63,64,66 | P12.Sustainable evidence based change1,4,7, 16, 17,19, 22, 25,28, 29,30, 32,38, 39, 40, 41, 42, 43,44, 47,50,52,56,58,62,64  P13.Evidence of Learning from local history of building on what works/what is valued/doesn’t work1,5,6,16, 17,29, 30, 32,38, 39, 41, 42, 43,44, 46, 47, 48,50,52,56,57,58,61,62,64,66  P14.Increased staff confidence, self- awareness and staff empowerment3,6,8,11, 14, 16, 17,19, 20, 22, 29, 30, 31, 32,37, 38, 39, 41, 42, 43,44, 45, 46, 47, 48,50,52,56,57,61,62,63,64,66  P15.High performing flourishing teams4,9, 10, 11, 14, 16, 17,19,20, 22, 25, 29, 30, 31, 32,37, 38, 39, 41, 42, 43,44,45, 46,47,48,50,52,56,57,58,64,65,66  P16.Staff feel valued at work 4,9, 14, 16, 17, 19, 22, 23, 29, 30, 31, 32,38, 39, 41, 42, 43,44, 46, 47, 48,50,61,62,63,64,65,66 | S17.Staff team recognition/external awards3, 16, 17, 19, 22, 30, 32,38, 39, 41, 42, 43,44, 47,62  S18.Employee commitment to work and learning3, 14, 15, 16, 17, 18, 19,20 22, 25,29, 30, 31, 32, 37 38, 39, 41, 42, 43,44, 46, 47, 48,50,52,57,62,64,66  S19. Quality placements4,9, 13,14, 15, 22, 30, 31, 47,56,61,62, 67  S20 Positive Student learning outcomes4,9, 15, 22, 23 30, 31, 47,56,57, 61,67  S21. Enhanced Job satisfaction4,9, 14. 15 16, 17, 18,19, 22, 23 30, 31, 32,37, 38, 39, 41, 42, 43,4445, 46, 47, 48,52,57,61,66  S22.Reduced Turnover rates 14, 15, 16, 17,19, 22, 30, 31,32, 38, 39, 41, 42, 43,44, 47,64.67  S23. Staff commitment to organisation4, 14, 16, 17,19, 22, 23, 30, 32,38, 39, 41, 42, 43,44, 47, 48,50,52,57,62,64,66  S24.Improvements in practice and services across systems2,11, 14, 15, 16, 17, 18, 19, 20, 21, 22, 23, 25, 29, 30, 32, 37, 38, 39, 41, 42, 43,44, 45,46,47,48,56,58,61,64,65,66 | L7. Improved Recruitment4 14, 16, 17,19,22, 30, 32, 38, 39, 41, 42, 43,44, 47, 67  L8. Improved Retention4 14, 16, 17, 19, 22, 30, 32, 38, 39, 41, 42, 43,44, 47,57,64,66, 67  L9. Improved staff wellbeing outcomes4, 10, 14, 16 17,19, 22,27, 29, 30, 31, 32, 38, 39, 41, 42, 43,44, 45, 46, 47, 48,50,56,57,61,62,64,66  L10.Improved Equality, diversity and inclusion indicators for workforce 11,15, 30, 32,43  L11. Improved social capital[[1]](#footnote-1) and human community resource 8, 15, 17, 19,24, 29, 30, 32,40, 43, 45,50,64, |
| **CAPABILITIES WRAPPED AROUND**  **PEOPLE & COMMUNITIES** | CWC1.Multi professional career and capability frameworks wrapped around health and social care needs of service users in care pathways2,4,12, 15, 16, 18,26, 29, 30,33,36, 38, 39, 42, 47,52,56,58,64,65  CWC2. Identification of gaps in systems and service needs 3, 16, 18m,19 ,20, 22,29, 30, 32,33, 38, 39, 40, 43, 47,52,56,57,58,61,62,64  CWC3. Building workforce capabilities around the needs of people and communities rather than professions 4,9, 12, 15, 6516, 18,20, 22,29, 30,33,36, 38, 40, 43,50,52,56,57,58,64  CWC4.Building workforce capabilities and skillsets that integrate five skillsets of Venus model 4, 12, 15, 16, 17, 20, 22, 23,29, 30, 31, 32,33,36,37, 38, 39, 41,42,43,44, 45, 46, 47, 48,49, 50,52,57,58,62,64,65,67  CWC5.Focus on assessment of multidisciplinary team capabilities3,12, 15, 16, 17,18, 23, 29, 30, 31, 32,33,36, 38,41,43,44,47,52,56, 57,  58,62,64 | CWC6.Staff recruitment and retention strategies that attend to competence, role clarity, empowerment and support2, 14, 16, 17,19,20,22, 26,27,30, 32,36, 38, 39,41, 42, 47, 48,50,52,57,58,62,64  CWC7.Embedded researchers 4,7,16, 17, 27, 30,36, 38, 39, 43, 47,50,52,57,58  CWC8. Learning organisations, using evidence informed practices blended with Transfer of learning into practice, the strengths of people and local contexts 3,4,13, 14, 16, 17,19, 20,28, 29, 30, 32,36, 38, 39, 40, 41, 42, 43, 44,50,52,56,57,58,61,62,64,65  CWC9.Enable health and social care students to feel they can actively make a difference to the health of their communities whilst they learn 13, 15, 22, 30, 31, 46,56,57,61 | CWC11.Interprofessional team working3,4,11,13, 15, 16, 17,19,20, 22, 23, 26,28, 29, 30, 31, 32,36, 38, 39, 41, 42, 43,44, 45,46,47,48,52,56,57,58,62,63,  64,66  CWC12.Adapting to changing needs of society. 3,8,13, 14, 15, 16, 19,20, 29, 30,36, 38, 39, 40, 41,42,43,44,47,52,57,58,61,64,66 | P17.Career progression opportunities enhanced.3,7, 12,14, 16, 17,19, 20, 21 22, 30, 32,36, 38, 39, 41,42,44, 47,52,56,57,58,61,64  P18. CPD funding and commissioning invests in human resources for impact on practice 3, 14, 16, 17, 30,36, 38, 39,41,42, 47,50,52,56,57,58,61,62,64,66  P19.Reduced duplication of roles, functions and activities7, 16, 17,19,20,29, 30,32,36,38,39,41,42,43,44,57,58,  64  P20.Reduced staff intention to leave 16, 17,19, 22, 30, 32,37, 38, 39, 41, 42, 43,44, 45, 46, 47, 48, 67  P21.Whole systems urgent and emergency care to relieve the pressure on emergency departments 2,12, 18, 32,47,57,58  P22.Staff possess the skills and ability to work across integrated systems focussed on place12,13, 15,16, 17,18,19, 20,22, 23 30, 32,33,36, 3738, 39, 41, 42, 43,44,45, 46, 47, 48,52,56,57,58,61,64, 67 | S25.Delivery of person centred safe and effective evidence informed care in the workplace.2, 3, 5, 13, 14, 15, 16, 17,18,19, 20,21,22, 23,29 30, 31, 32,36,37, 38, 39, 40, 41, 42, 43,44, 45, 46, 47, 48,50,52,57,58,61,62,64  S26.Improved continuity and consistency experienced by service users3, 14, 15, 16,19,20, 22, 29,30,32, 37, 38, 39, 40, 41, 42, 43, 45, 46, 47, 48,56,57,58,61,64  S27. Improved use of resources due to reduced duplication, improved productivity2, 14, 15, 16, 17,18, 19,20,23,27,29, 30,32,38, 43.45, 46, 47, 48,56,57,58,64  S28. Return on investment with tangible fiscal measures linked to quality focussed outcomes3, 16, 17,18,19,22, 27, 30, 32,38, 39, 41,43, 47,56,57,58,64, 67 |
| **GROWING WORKFORCE CAPABILITIES**  **TO MEET CHANGING HEALTH, ILLNESS, CARE NEEDS** | GWC1. Growing integrated skillsets (leadership, culture change, practice development, facilitation and innovation and improvement) for sustainable person centred safe and effective care3, 10, 14, 15, 16, 17,18,20,22,23, 25,27,28,29, 30, 31, 32,34,35,37, 38, 39, 41, 42, 43,44,45, 46, 47, 48,50,52,57,58,61,62,64,65  GWC2. CPD driven transformation to deliver person centred safe and effective evidence informed care in the workplace.3, 14, 15, 16, 17, 22, 30, 32,38, 39, 40,50,52,56,57,58,61, 62,  64,65,66  GWC3.Apprenticeship Scheme embedded across the system 7,30,58  GWC4. Preceptorship Scheme embedded across the system 17,22, 30, 31, 47,56,58,61, 67 | GWC5.Work based facilitators of integrated learning, development and improvement.1,**2,3,4,5,11,13, 14, 15,** 16, 17,19,20, 28,29, 30, 31, 32,34,35, 38, 39, 41,42,43,44, 45, 46, 47, 48,49, 50,52,56,57,58,61,62,63,64, 68  GWC6.Using workplace as main resource for learning, development improvement2,3,4,5, 13, 14 15, 16, 17,19, 29, 20,21,22,23,28, 29,30, 31, 32,34,35, 37, 38, 39,41,42,43,44,45,46,47,48,49, 50,52,56,57,58,61,62,63,64,65,66, 67  GWC7. Critical mass of multi professional facilitators who can integrated learning, developing, improvement, knowledge translation, inquiry and innovation in practice4, 13, 14, 15, 16, 17,19,20, 23, 26,27,28,29, 30, 31, 32,34,35, 38, 39, 41, 42, 43,44, 47,50,52,56,57,58,61,62,64,65 | GWC8.Culture of inquiry and learning 3,5, 10,13, 14, 15, 16, 17,19,20, 22, 23, 25,27, 29, 30, 31, 32,34, 37, 38, 39, 41, 42, 43,44, 45, 46, 47,48,50,52,56,57,58,61,62,  64,65,66, 67  GWC9.Bringing about social change through learning and achieving values-based person-centred models of care and ways of working in the workplace. 3, 10, 11,15, 16, 17,19,20, 21,23 25,29, 30, 31, 38, 39, 40, 41, 42, 43,4445, 46,47,48,50,52,56,57,58,61,62,  64,65,66  GWC10.Workplace learning opportunities for career development including Accredited Learning based on experience, reflection and evidence of impact7, 14, 15, 16, 17, 19, 20,22, 23, 29, 30, 32,33, 34,36, 37 38,39, 4445, 46,47,48,50,52,57,58,61,62,64,  65  GWC11.Improved wellbeing through critical companionship/supervision/mentoring 17,19,20, 22, 29, 30, 31, 32,34,37,38,39,41,43,44,47,  48,50,52,56,57,58,61,62,64,  65,66,67 | P23. Role clarity3, 16, 17,20, 22, 29, 30,31, 32,37, 38, 39, 41,42,43,44,47,48,50,52,56,57,58,  61,62,64  P24. Increased staff wellbeing based on agreed values and effective workplace cultures that enable positive engagement with changeand change for good 3, 6, 10, 13, 16, 17,19, 20, 22, 23 25, 26,27,29, 30, 31, 32,37, 38, 39, 40,41,42,43,44,45,46,47,48,50,52,56,57,58,61,62,64,66  P25.Knowledge developed and used in, through and from practice3, 14, 15, 16, 17, 19, 20,20,22,29, 34, 30, 31, 32,37, 38,39, 41, 42, 43,4445, 46, 47, 48,49, 50,52,56,57,58,61,62,64, 67  P26.Innovation and creativity capabilities 3,6, 15, 16, 17,19,20,22, 29, 30, 31, 32,37, 38, 39, 40, 41, 42, 43,4445, 46, 47, 48,50,52,58,61,64,66  P27. Transformation skills to meet a continually changing context3,4,9, 14, 15, 16, 17,19,20, 22,29, 30, 31, 32,35,37, 38,39, 40, 41, 42, 43,44,45,46,47,48,50,52,56,57,58,61,64,65  P28. Curriculum content for High Education Institutions and Further Education Colleges driven by practice, workforce and service needs**2**,7, 14, 15, 17,20, 22, 30, 31, 33, 42,52,56,57,58,61,62 | S29. Improved Qualityoutcomes for people and services2, 16, 17,18,20, 27, 29, 30, 32,34,38,39,41,42,43,44,50,52,56,57,58,61,62,64,66  S30. QI & Lean management principles embedded at all levels of the system1, 16,17, 19,30, 32,38, 39, 41,56,57,58,62,64  S31. Career progression pathways for growth of the workforce3,4, 12, 16, 17, 19,20,30, 32,38, 39, 42,52,56,57,58,61,62,64,65  S32.Teams recognised as having good workplace cultures and good places to work5, 14, 16, 17,19, 20,21, 29, 30, 31, 32,34, 37, 38, 39, 41, 42,43,44, 46, 47, 48,49, 50,52,56,57,58,61,62,64,65,66  S33. Increased research and evaluation funding to support embedded development and transformation7, 16, 17,22, 23, 30, 32,38, 39, 43,45, 46, 47, 48,65 |

**Publications, reports and case studies reviewed to generate themes**

1. Best, A, Greenhalgh, T, Lewis, S., et al. Large-System Transformation in Healthcare: A Realist Review’, *The Milbank Q*. 2012; 90(3):421- 456. DOI: 10.1111/j.1468- 1060 0009.2012.00670.x
2. Manley K, Martin A, Jackson C, Wright T*.*  Using Systems Thinking to identify workforce enablers for a whole systems approach to urgent and emergency care delivery: A multiple case study  *BMC Health Services Research*2016;**16**:368 <https://doi.org/10.1186/s12913-016-1616-y>
3. Manley K, Martin A, Jackson C, Wright T. A realist synthesis of effective continuing professional development (CPD): a case study of healthcare practitioners' CPD. *Nurse Education Today*. 2018; 69:134-141. 13. 21.
4. Manley K. & Jackson C. The Venus model for integrating practitioner‐led workforce transformation and complex change across the health care system. *Journal of Evaluation in Clinical Practice- International Journal of Public Health Policy and Health Services Research*, 2020; 26(2) 622-634 <https://doi.org/10.1111/jep.13377>.
5. Manley K, Jackson C, McKenzie C. Microsystems culture change- a refined theory for developing person centred, safe and effective workplaces based on strategies that embed a safety culture, *International Journal of Practice Development*, 2019; **9**(2) 34-141.
6. Cardiff S, Sanders K, Webster J, Manley K. Guiding lights for effective workplace cultures that are also good places to work. *International Practice Development Journal*. 2020, 10(2):1-20. 10.19043/ipdj.102.002v2.
7. Manley K, Crouch R, Ward R, Clift E, et al. The role of the multi-professional consultant practitioner in supporting workforce transformation in the UK. *Advanced Journal of Professional Practice*. 2022; **3**(2): 1-26. <https://doi.org/10.22024/UniKent/03/ajpp.1057>.
8. Jackson C, McBride T, Manley K, Dewar B, et al. Strengthening nursing, midwifery and allied health professional leadership in the UK – a realist evaluation, *Leadership in Health Services*, 2021; **34**(4):392-453. <https://doi.org/10.1108/LHS-11-2020-0097>.
9. Venus programme theory, derived from Manley K. & Jackson C. (2020) The Venus model for integrating practitioner‐led workforce transformation and complex change across the health care system. *Journal of Evaluation in Clinical Practice- International Journal of Public Health Policy and Health Services Research*, 20 January, <https://doi.org/10.1111/jep.13377>.
10. Jackson C, Manley K, Webster J, Hardy S.  System wide learning from first wave Covid 19: A realist synthesis of what works? *Research Square*; 2020. DOI: 10.21203/rs.3.rs-115647/v1.
11. Jackson C, Manley K, Webster J, Hardy S. System wide learning from first wave Covid 19: A realist synthesis of what works? *Research Square*; 2020. DOI: 10.21203/rs.3.rs-115647/v1. <https://doi.org/10.1108/LHS-11-2020-0094>.
12. Martin A, Manley K. Developing an integrated career and competence framework for a whole systems approach to urgent and emergency care delivery. *Int Emerg Nurs*. 2020;**48**:100784. doi: 10.1016/j.ienj.2019.06.007.
13. Germaine R, Manley K, Stillman K, and Nicholls PJ. Growing the interprofessional workforce for integrated people-centred care through developing place-based learning cultures across the system *International Practice Development Journal* 2022; **12**(1) Article 4 May <https://doi.org/10.19043/ipdj.121.004>.
14. Jackson C, Manley K. Contemporary Challenges of Nursing CPD: Time to change the model to meet citizens' needs. *Nurs Open*. 2022 Mar;9(2):880-891. doi: 10.1002/nop2.941.
15. Howarth ML, Bayley K, Brown L, Dunn J, et. al. *Personalised Care Interprofessional Education Framework (PerCIE): Social prescribing placement curriculum document and guiding principles for undergraduate/postgraduate health and social care students*. 2021. University of Salford. ISBN 978-1-912337-51-4.
16. Jackson C, Furber L, Manley K. *Marie Curie Career Capability Framework Refinement, Pilot Implementation and Evaluation*. University of East Anglia 2022, Unpublished Report.
17. Jackson C. and Manley K. A shared purpose framework for the Practice Development Team at Gloucestershire NHS Foundation Trust. 2021; University of East Anglia. Unpublished Report.
18. Wilsher S. and Jackson C. An evaluation of the Think 111 First Service in Norfolk and Waveney CCG Urgent and Emergency Care Services. 2021; University of East Anglia Unpublished Report.
19. Manley K, Dewar B, Jackson C, MacBride T, et al. *Strengthening Nurse, Midwifery and Allied Health Professional Leadership*. Final Report 11th March 2019. Funded by Burdett Trust
20. Manley K, Titchen A. Facilitation Skills – The Catalyst For Increased Effectiveness In Consultant Practice And Clinical Systems Leadership *Educational Action Research*. 2016; **24**(2):1-24 <https://www.tandfonline.com/doi/full/10.1080/09650792.2016.1158118>
21. Manley K, Crouch R, Furber L. *The Development Pathway from Advanced Practice to Consultant Practice Using a Modified Delphi Approach*. Final Report 2021; UEA/Health Education England.
22. Hardy, S. (2023). A case study evaluation of the legacy practitioner role: implications for system and workforce transformation. *International Practice Development Journal*, 13(1). <https://doi.org/10.19043/ipdj.131.007>
23. Hardy SE, Malby R, Hallett N, Farooq A, et al. "Introducing a People’s Academy into Higher Education: A coproduction approach to sustained well-being", Higher Education, Skills and Work-Based Learning, 2018: **8**(1):70-79. https://doi.org/10.1108/HESWBL-10-2017-0075
24. Manley K, Jackson C. *Our Special Friends & Animal Companionship Support: Summary of Workshop Outputs Report*, UEA. 2021; October ISBN 978-1-3999-0745-3.
25. McKellar D, Stanley H, Manley K, Moore S, Lloyd T, Hardwick C, Ronder J From Fractured to Flourishing: Developing Clinical Leadership for Frontline Culture Change.In*:* Manley K,Wilson V, Oye C. (Eds) *International Practice Development in Health and Social Care.* Oxford Wiley Press Blackwells. 2021: 173-186.
26. Manley K, Saunders K, Wilkinson D, Faruqui R, Sakel M. Co‐creating system‐wide improvement for people with traumatic brain injury across one integrated care system in the United Kingdom to initiate a transformation journey through co‐production. *Health Expect*. 2023;1‐13. <https://doi.org/10.1111/hex.13712>.
27. Whitehouse CL, Tinkler L, Jackson C*,* et al*.* Embedding research (ER) led by nurses, midwives and allied health professionals (NMAHPs): the NMAHP-ER model. *BMJ Leader.*Published Online First: 22 April 2022. doi: 10.1136/leader-2021-000578.
28. Skingley A, Godfrey M, Henderson R, Manley, K, et al. Implementing the PIE (Person, Interaction and Environment) programme to improve person-centred care for people with dementia admitted to hospital wards: a qualitative evaluation. *International Practice Development Journal*. 2021;**11**(1). <https://doi.org/10.19043/ipdj.111.005>.
29. Manley K, Parlour R, Yalden J. The use of action hypothesis to demonstrate practice development strategies in action. In McCormack B, Manley K, Titchen, A. Practice Development in Nursing and Healthcare (2nd ed) Chichester: Wiley-Blackwell, 2013:252-274
30. Jackson, C. *Torbay and South Devon NHS Trust Integrated Workforce Education Strategy Report. Key Findings and Recommendations*. University of East Anglia Unpublished Report. 2022
31. Jackson, C. *Liverpool John Moores University Leadership Resource Placement Pack*. Unpublished Report. 2022 University of East Anglia
32. Jackson, C. The Venus Programme -Getting Business Ready for Sustainable Transformation in a Social Enterprise (IC24). An impact evaluation. 2023; University of East Anglia.
33. Manley K and Jackson C. *East of England Eyecare Workforce Transformation through increasing capacity and capability, integrating advancing practice initiatives and the Ophthalmic Practitioner Training programme (OPT) Phase 1: Final Report*. ImpACT Research Group, School of Health Sciences. University of East Anglia Unpublished 26th October 2022.
34. Akhtar M, Casha J N, Ronder J, Sakel M, Wight C,Manley K. Leading the health service into the future: transforming the NHS through transforming ourselves *International Journal of Practice Development* 2016; 6(2) Article 5 https://doi.org/10.19043/ipdj.62.005 .
35. Martin A, & Manley K. Developing standards for an integrated approach to workplace facilitation for interprofessional teams in health and social care contexts: a Delphi study. *Journal of Interprofessional Care*, 2017;*32*(1), 41–51. <https://doi.org/10.1080/13561820.2017.1373080>
36. Manley K. & Crouch R. *Co-creating a developmental pathway for multi-professional consultant practice: Building on the outputs from the three care group workshops. Final Report.* April 2022; University of East Anglia and Health Education England
37. Hardy S. The Vital Signs project report. Vision, Innovation, effective Team working, Accountability and approaches for work-based learning as effective Leaders. A project report for Norfolk and Suffolk Mental Health Care NHS Foundation Trust. 2023
38. Jackson C. & Ward R. An evaluation of the East of England Multiprofessional Aspiring and Consultant Practitioner Programme. University of East Anglia. July. 2023
39. Abrahamson V, Baldock B, Tomlinson L, Jackson C, Manley K, Wilson, P. (). Research Champions: mixed methods evaluation of an interdisciplinary programme for community nurses and allied health professionals to build research capacity. *Advanced Journal of Professional Practice*. 2023;4(1):33–55 (SUPPL1. DOI:https://doi.org/10.22024/UniKent/03/ajpp.1166.
40. Jackson C, Wilson V, McCance, T, Alomari A. Flourishing people, families and communities. In: Manley K, Wilson V, Oye C. (Eds) *International Practice Development* *in Health and Social Care* (2nd ed). Chichester: Wiley Blackwell. 2021:237-250
41. Jackson C. *Impact Evaluation Report- A tailored programme of support for the Practice Development Team to evidence impact of their effectiveness and contribution to Gloucestershire Hospitals NHS Foundation Trust.* University of East Anglia Report. 2023
42. Jackson C, Furber L, Marsden, D.*Creating Caring Cultures Fellowship, for aspiring leaders and early career frontline Registered Learning Disability Nurses (RNLD).* University of East Anglia Report. 2023
43. Jackson C. & Marshall J. *Cambridgeshire and Peterborough Adopting Innovation Hub. Final Summative Evaluation Report* *What works?* University of East Anglia Report. 2024

44. Jackson, C. *Report from the IPDC Foundation Practice Development School with the Gloucester Hospitals NHS Foundation Trust Practice Development Team*. University of East Anglia Report. 2023

45. Hardy S, Drysdale L & Tuson G. Partnering Curiosity with Creative Connections through the Change Minds Project: An Integrated Community Case Study. Researchsquare. 2024. doi.org/10.21203/rs.3.rs-4730707/v1

46. Hardy S, Webster J, Jackson C, & Willmott S. The Centenary of Caring Project: A co-created public art exhibition expressing how COVID-19 impacted on health and social care settings in East Anglia: Centenary of Caring Project. *Journal of Arts and Humanities*, 2023;**12**(4):51-62

47. NICHE Impact Assessment Report. Report for the Norfolk and Waveney integrated Care system. May 2024 Available via NICHE website. <https://www.uea.ac.uk/f/185167/x/d4b6d52ddf/niche-impact-final-report-august-2024-1.pdf> ( Accessed 12th March 2025)

48. Yuen J and Odell J. Planting the seeds for change: A Participatory Service Evaluation of the "Leading and Facilitating the Development of Person- Centred Care and Cultures" Programme. A participatory impact narrative report. 2024 Available via NICHE website. <https://www.uea.ac.uk/f/185167/x/cb5aecdc09/nsft_-niche-residential-programme-web-ver-final-report.pdf> (Accessed 12th March 2025)

49. Hardy, S, Webster, J. Jackson, C. & Manley K. Educating Advanced Level Practitioners through Transformational Practice Development: Issues of Complexity. *Nurse Education Today*2013;**33**(10):1099-103

50. Manley, K. *Insights into Developing Caring Cultures: A Review of the Experience of The Foundation of Nursing Studies* (FoNS) www.fons.org/resources/ documents/CultureReviewFinalReport March, 2013, Funded by the Institute of Improvement and Innovation

51.Jackson C, Manley K, Webster J, Hardy S. Learning from Covid Across the System: A thematic evaluation of the Norfolk and Waveney Sustainability and Transformation Partnership ‘We Care Together’ Campaign. ImpACT Research Group University of East Anglia 18th September 2020

52. Manley K,O’Keefe, Jackson C, Pearce J; Smith S**.** A shared purpose framework to deliver person centred safe and effective care: organisational transformation using practice development methodology. *International Journal of Practice Development* 2014**;4**(1) [2]

53. Jackson, C. Manley, K., Wright, T. A Scoping Project to Develop a Shared Purpose Framework for the Delivery of First-Class Community Nursing Services Across Kent and Medway. Final Report ECPD 2014**;** ISBN 9781909067219

54. Jackson C, Leary A, Manley K, Wright T, Martin A, Leadbetter T. *The Cassandra* *Project: Recognising the Multidimensional* *Complexity of Community Nursing for* *Workforce Development.* ECPD Final Report. 2015; ISBN 978-1-909067-45-5

55. Jackson, C, Leadbetter T, Manley K, Martin A, Wright T. () Making the complexity of community nursing visible: the Cassandra project. *British Journal of Community Nursing*, March 2015; **20**(3):126-133.

56. Germaine R, Govender N, Manley, K. Padfield, M, Parker S, and Edmunds, H. (2025) The Best Practice Prescribing Framework for Multi-Professional Prescribing (MPP) across the UK. Royal Association for Prescribers.

57. Manley K, Martin A, Jackson C, Wright T. *Transforming Urgent & Emergency Care Together Phase 2 Report: Developing Standards for Integrated Facilitation in and About the Workplace* England Centre for Practice Development, Canterbury.  December 2015 ISBN: 978-1-909067-547

<http://create.canterbury.ac.uk/14241/3/14241.pdf>

58. Manley K, Jackson C, Martin A, Apps J, Setchfield I, Oliver G.*Transforming* *Urgent and Emergency Care Together* ECPD Final Report Phase 1, 2014 ISBN 978-1-909067-36-3

59. King R, Taylor B, Talpur A, Jackson C, Manley K, et al. Factors that optimise the impact of continuing professional development in nursing: a rapid evidence review *Nurse Education Today.* 2020**;** [**98**](98)<https://doi.org/10.1016/j.nedt.2020.104652>

60. Jackson C, Manley K, Wright T, Martin A. *Continuing Professional Development* *for Quality Care: Context, Mechanisms,* *Outcomes and Impact.* Final Report ECPD 2015,ISBN 978-1-909067-39-4

61. Manley K; Greaves, J (2016) *Implementing & evaluating a community of practice for health visiting.* England Centre for Practice Development, Canterbury Christ ChurchUniversity, Canterbury.Funders HealthEducation Kent, Surrey, Sussex.

62. Manley K**,** Jackson C, Mckenzie C, Martin A, Wright T. Safety Culture, Quality Improvement, Realist Evaluation (SCQIRE) Evaluating the impact of the Patient Safety Collaborative initiative developed by Kent Surrey and Sussex Academic Health Science Network (KSSAHSN) on safety culture, leadership, and quality improvement capability. 2017ISBN 978-1-909067-79-0

63. Godfrey M, Young J, Shannon R, Skingley A, Woolley R, Arrojo F,  [Brooker D](https://www.journalslibrary.nihr.ac.uk/search/#/?search=%22Brooker%20D%22), [Manley K](https://www.journalslibrary.nihr.ac.uk/search/#/?search=%22Manley%20K%22) & [Surr C](https://www.journalslibrary.nihr.ac.uk/search/#/?search=%22Surr%20C%22)*.* The Person, Interactions and Environment Programme to improve care of people with dementia in hospital: a multisite study. *Health Serv Deliv Res* **2018**;6(23)

64. Solman A, Manley K, Christie J. Systems Leadership Enablement of Collaborative Healthcare Practices. In*:* Manley K**.** Wilson, V, Oye C. (Eds) International Practice Development in Health and Social Care (2nd ed), Chichester: Wiley Blackwells 2021:187-204

65. Manley, K. Embedded research: working with the swampy lowlands and its inhabitants. *The Epistemic Insight Digest* Issue 5, 58-62 Autumn, 2022, Faculty of Arts, Humanities and Education, Canterbury Christ Church University. <https://repository.canterbury.ac.uk/download/a90c679856696be0ef865e51181ce5a4055381a69bf41474c8694ea9a147eeaf/5829541/EI-student-digest-issue-5%20final.pdf#page=58>

66. Manley K, & Jackson C. Multi professional Masterclass series April-November 2019. Evaluation Report. England Centre for Practice Development Canterbury Christ Church University, 2020

67.Hardy S.  *Evaluating the Legacy Practitioner role across the East of England.  An evaluation report*. May 2024.

1. “the social networks, norms and sanctions that facilitate co-operative action among individuals and communities." (Harplen 2005, p39) [↑](#footnote-ref-1)
