# Supplementary material for: Evidencing Impact of Large-scale Health System Transformation: Introducing the ‘shift’ Framework
Source: Research Square preprint supplement (doi:10.21203/rs.3.rs-7715080/v1), 2025-11-26
Supplement: Supplementary file 2 [file d955fcfc6bec2bf87727b1b3.docx]

**SUPPLEMENTARY DATA FILE 1: Projects, reports and publications meeting the inclusion criteria for the multiple case study meta-analysis**

**Inclusion and Exclusion criteria used for screening practice development (PD) projects within the multiple case study**

| **Inclusion Criteria:** | **Exclusion Criteria:** |
| --- | --- |
| - All projects facilitated using PD principles between 2012 – 2024, specifically: - collaboration, inclusion and participation with stakeholders across project activities (including evaluation) - a focus on transparent analysis of project data ‘with’ people rather than ‘on’ them - All project related publications and outputs between 2012-2024including:   - an aspect of system and/or workforce transformation   - any system level (micro, meso- and or macro) to large scale (regional, national) health and/or care | - Did not use PD principles - No focus on system or workforce transformation or any element of this - Chapters which replicate research published in a formal report/publication - Opinion pieces, editorials and learning and development tools/publications - Publications before 2012 |

| **Project Scope** | **Project**  **No.** | **Output:**  R=Report, PRP = Peer reviewed publication  C =chapter  [Reference no. See Supplementary data file 2] | **FOCUS & PURPOSE** | **System Level** | **CONTEXT & FUNDER** | **Project**  **Sub Totals** |
| --- | --- | --- | --- | --- | --- | --- |
| **International partners** | 2 | C [29] | Action hypothesis developed from across three projects to demonstrate practice development strategies in action in Ireland, England and Australia | Micro  Meso | Community hospital (Ireland), acute provider (England), acute stroke unit (Australia)  Either public funded or funded as part of role as embedded researchers working with health and care partners, organisations and systems | 6 |
| 5 | C [40] | Flourishing families and communities | Micro  Meso  Macro | Health and social care context, all health and care professions |
| 17 | R [9]; PRP [4] | Venus model: integrating practitioner led workforce transformation & complex change distilled from outputs of projects linked to culture change, clinical and systems leadership, facilitation, quality improvement and practice development | Mico  Meso  Macro | All healthcare professions and contexts.  Funded as part of role as embedded researchers working with health and care partners, organisations and systems |
| 18 | PRP [6] | Distilling the guiding lights of effective workplace cultures that are good places to work – International Practice Development Colloquium | Micro  Meso  Macro | All health and care settings, quality, safety, workforce.  Funded as part of role as embedded researchers working with health and care partners, organisations and systems |
| 19 | C [64] | Systems leadership and enablement of collaborative health care | Micro  Meso  Macro | All health care, systems leadership & workforce facilitation  Funded as part of role as embedded researchers working with health and care partners, organisations and systems |
| 45 | PRP [45] | Partnering curiosity-Creative connection – changing minds | Micro  Meso  Macro | Cross disciplinary, government, health community, patients, prisons etc  No funding. Lecturers and students gave their time voluntarily. |
| **National &/UK focus** | 1 | PRP [20] | Facilitation expertise and its impact on increasing others effectiveness through consultant practice and systems leadership | Micro  Meso  Macro | All contexts, Nursing predominantly.  Funded as part of role as embedded researchers working with health and care partners, organisations and systems across UK | 12 |
| 3 | PRP [49] | Transformational Practice development for advanced level practice | Micro | Advanced practice workforce  Funded via Health Education England |
| 4 | R [50] | Developing caring cultures, an independent review of 82 practice development project reports across the UK to identify what works | Micro  Meso | Nursing and other professions - all contexts  Funded by the Foundation of Nursing Studies (Charity), the provider of the programmes across the UK |
| 11 | PRP [14], [59] | Continuous Professional Development in nursing. A systematic review | Micro  Meso  Macro | Nursing in all contexts, also citizens perspectives  Funded by Royal College of Nursing |
| 15 | PRP [28], [63] | Implementing Person-Interaction-Environment (PIE) programme informed by National Audit | Micro  Meso | People with dementia in hospital wards  Funded by the National Institute of Health services Research across England sites |
| 16 | PRP [23] | Peoples Academy for sustaining wellbeing | Micro  Meso  Macro | Health and social care workforce, higher education. Funded by London South Bank University |
| 23 | R [19], PRP [8] | Developed the five guiding lights and an impact framework for strengthening nursing, midwifery and Allied Health Profession leadership in all contexts i.e. strategy, education, research, management | Micro  Meso  Macro | Nursing, midwifery, AHPs all contexts  Funded by the Burdett Trust (Charity) |
| 24 | R [15] | Social prescribing curriculum and placements | Micro  Meso | All health and care professions |
| 27 | R [16] | Development of a UK wide Marie Curie Career and Capability framework through co creation. Marie Curie is a charity providing UK wide end of life and palliative care in different settings including peoples’ homes and hospices | Micro  Meso  Macro | Multi professional workforce palliative care and end of life care  Funded by Marie Curie (Charity) |
| 28 | R [36],[21], PRP [7] | Co-creation of a capability & impact framework and a developmental pathway for Multi-professional consultant practice, embracing systems leadership, embedded research, and workforce transformation across the UK informing the national workforce strategy for NHS England. | Micro  Meso  Macro | Multiprofessional – all contexts  Funded initially by a small grant from Canterbury Christ Church University, then by Health Education England |
| 31 | R [56] | Development of multi professional prescribing guidelines with all stakeholders | Micro.  Meso  Macro | All contexts and professions  No funding |
| 41 | R [42] | Creating caring cultures for aspiring leaders | Micro  Meso | Learning disability nursing workforce  Funded by Foundation of Nursing Studies |
| **England**  **Region** | 8 | R [54], PRP [55] | Complexity of community nursing for workforce development | Micro  Meso  Macro | District and community nursing service | 17 |
| 10 | R [58], [57]  PRP [2],[35],[12] | Stakeholder evaluation to identify gaps and actions for a whole system approach across the south-east of England for Transforming Urgent and emergency care together for whole systems approach –included the need for systems leadership, an international Delphi study to identify facilitation standards for integrating learning, development, improvement, inquiry, knowledge translation, innovation using the workplace as the main resource and an integrated capability framework across all disciplines and system partners to address gaps identified | Micro  Meso  Macro | Urgent and emergency care, all professions, all partners, all contexts.  Funded by Health Education England, Kent, Surrey and Sussex |
| 12 | R [60], PRP [3] | Factors optimising impact of Continuous Professional Development in relation to all health care professions and its impact on transformation of workplace culture, knowledge translation, team capabilities to meet changing health care needs and professional career progression. A Realist evaluation | Micro  Meso  Macro | All health care professions in all contexts.  Funded by Health Education England to inform Education outcomes Framework |
| 14 | R [62], PRP [5] | Safety Culture, Quality Improvement. Evaluating the impact of the Patient Safety Collaborative initiative developed by Kent Surrey and Sussex Academic Health Science Network (KSSAHSN) on safety culture, leadership, and quality improvement capability  Aimed to identify what works across four acute hospital trusts in south-east England resulting in programme theories to guide the role of healthcare organisations | Micro  Meso | Four Acute hospitals across the south-east region of England involving all professions.  Funded by the Academic Health Science Network, Kent, Surrey and Sussex, |
| 20 | R [24] | Our Special Friends – animal companionship support. Practice development approach used to co-create a conceptual and implementation framework for understanding and researching animal companionship in supporting people’s health and wellbeing | Micro  Meso  Macro | Animal companionship, loneliness and wellbeing.  Funded by Our Special Friends (Charity) |
| 21 | R [51] PRP [10] | System wide learning first wave of Covid | Micro  Meso  Macro | Multi professional workforce]  Funded by Norfolk and Waveney Clinical Commissioning Group |
| 25 | R [18] | Evaluation of Think 111 First Service | Meso  Macro | Urgent and emergency care all settings  Funded by Norfolk and Waveney Urgent and Emergency Care Clinical Commissioning Group |
| 29 | PRP [27], [65] | Embedded research- practice based approaches for improving quality, safety etc QI |  | All health care practitioners |
| 32 | R [30] | Workforce education strategy | Meso  Macro | Multi professional workforce in all health and social care contexts  Funded by Torbay and South Devon NHS Foundation Trust |
| 33 | R [31] | Resource placement pack - leadership | Micro  Meso | Nursing and midwifery workforce  Funded by Liverpool John Moores University |
| 34 | R [33] | Workforce transformation through increasing capacity and capability | Micro  Meso  Macro | All eyecare professionals at all levels  Funded by NHS England (East of England) |
| 35 | R [32] | Venus programme – getting business ready in a social enterprise | Micro  Meso  Macro | Senior leaders, all professions in emergency care, mental health and primary care contexts  Funded by Integrated Care 24 (IC24) |
| 37 | R [38], | Multi professional consultant practice programme | Micro  Meso  Macro | Multi professional advanced and consultant practice  Funded by East Suffolk and North East Essex NHS Foundation Trust |
| 39 | R [67], PRP [22], | Evaluation legacy practitioner | Micro  Meso | Interdisciplinary workforce  Funded by NHS England (East of England) |
| 40 | PRP [46] | Co-created art exhibition – impact of covid | Micro  Meso  Macro | Multi professional workforce, care homes & NHS  No funding |
| 44 | R [47] | Impact Assessment | Micro  Meso  Macro | Health and social care, voluntary sector  Funded through NHS England (formerly Health Education England) |
| 46 | R [43] | Innovation through codesign | Meso  Macro | All professions, any context  Funded by The Health Foundation |
| **Integrated care system/sub regional focus** | 6 | PRP [52] | Developing a shared purpose framework across a large acute university NHS Foundation trust structured around shared values of person-centred, safe and effective care aligned to the career framework | Micro  Meso | Initially developed with nurses and midwives, but then later extended to all professions to guide role expectations and leadership development  Funded as part of role as embedded researchers working with health and care partners, organisations and systems | 11 |
| 7 | R [53] | Developing shared purpose for first class community nursing services | Micro  Meso  Macro | District and community workforce  Funded by Health Education England Kent Surrey Sussex |
| 9 | C [25], PRP [34] | Transforming NHS through transforming ourselves, from fractured to flourishing cultures. Experiences and impact of participating in a integrated multi-professional clinical leadership programme underpinned by practice development to achieve transformation of self and flourishing cultures for own teams | Micro  Meso | All health professionals participating in clinical leadership programme  Funded as part of role as embedded researchers working with health and care partners, organisations and systems |
| 13 | R [61] | Implementing and evaluating a community of practice for health visiting across region to enable learning for greater effectiveness and impact as an individual and team leader | Micro  Meso  Macro | Health Visitors  Funded by Health Education England, Kent , Surrey and Sussex |
| 22 | R [66], PRP [11] | Impact evaluation of a multi professional leadership programme in primary care and general practice demonstrating impact on self, team and quality of care and culminating in an impact continuum | Micro  Meso | Primary care leadership and quality  Funded by North Kent Training Hub, Institute of Medical Sciences, Health Education England Kent, Surrey and Sussex |
| 26 | R [44],[41],  [17] | NHS Trust wide practice development team – workforce development and impact | Micro  Meso  Macro | Practice development workforce development  Funded by Gloucestershire NHS Foundation Trust |
| 30 | PRP [13] | Growing inter-professional workforce through place-based learning cultures across system. Co created workshops across integrated care system to identify core values, enablers, facilitation skills and impact of the concept of place-based learning | Micro  Meso  Macro | All partners and primary care networks across system  Funded as part of role as embedded researchers working with health and care partners, organisations and systems to support Darzi Fellow |
| 36 | PRP [26] | Co-created with all stakeholders the requirements and capabilities required for system wide improvement for people and those important to them following traumatic brain injury. Identified key enablers, features and impact at system and micro system level. | Micro  Meso  Macro | People with traumatic brain injury care across the system  Funded as part of role as embedded researchers working with health and care partners, organisations and systems to support Darzi Fellow |
| 38 | PRP [39] | Research champions in practice to build research capacity | Micro  Meso | Nurses and Allied Health professional  Funded by Kent Community Health NHS Foundation Trust |
| 42 | R [37] | Vision, innovation, effective team working | Micro  Meso | Health care workforce  Funded by commissioning NHS Trust partners |
| 43 | R [48] | Leading and facilitating person centred cultures | Micro  Meso | Mental health care  Funded by the Norfolk and Suffolk NHS Foundation Trust |
| Total outputs analysed: (R=33 + PRP=29 +C=4) = 66 outputs + Best et al (2012) PRP [1] = 67 outputs analysed | | | | | | |
| **TOTAL PROJECTS INCLUDED IN MULTIPLE CASE STUDY** | | | | | | 46 |
